# Supplementary material for: Synthesis and optimization of ZnPc-loaded biocompatible nanoparticles for efficient photodynamic therapy
Source: Royal Society of Chemistry journal article supplement (doi:10.1039/c6tb00307a), 2016-01-01
Supplement: c6tb00307a1.pdf [file c6tb00307a1.pdf]

*Supporting Information on:*

# Synthesis and optimization of ZnPc-loaded biocompatible nanoparticles for efficient photodynamic therapy

Jian-tao Ping, Hong-shang Peng, Wu-biao Duan, Fang-tian You, Min Song, Yi-quan Wang

Doping  
ratio (%)

Si-NPs

PLL-NPs

1

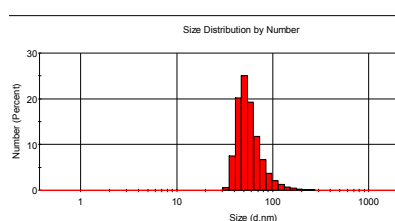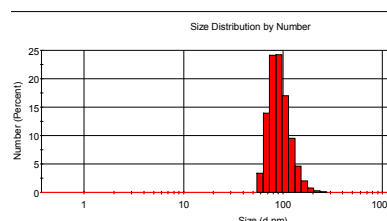

2

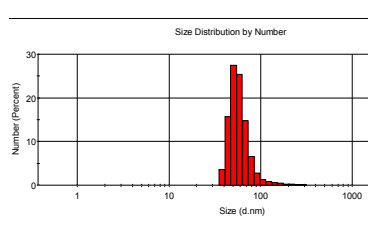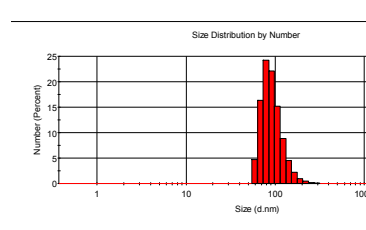

3

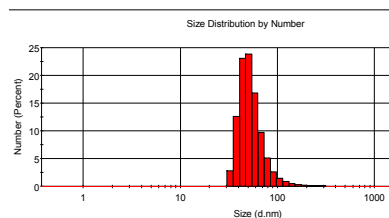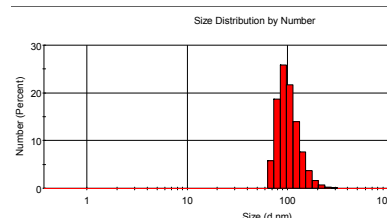

4

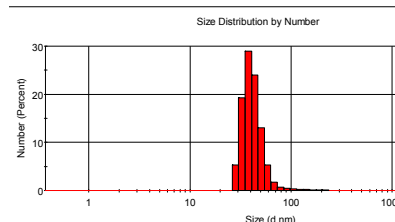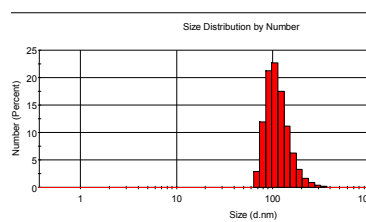

5

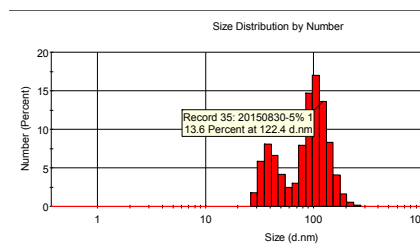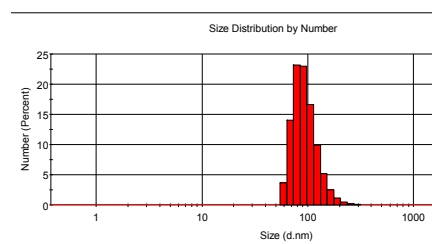

6

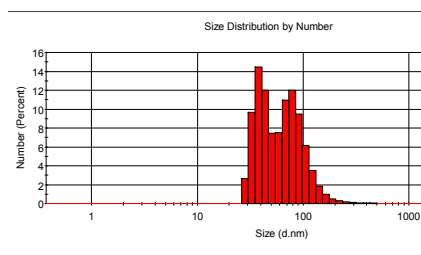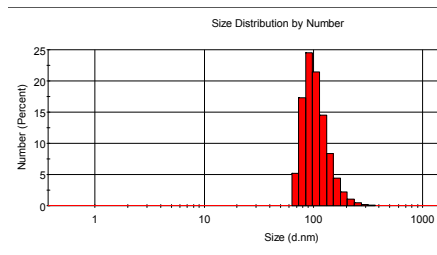

7

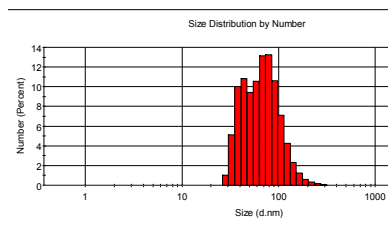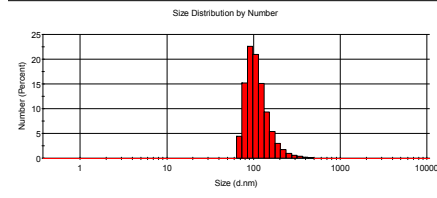

8

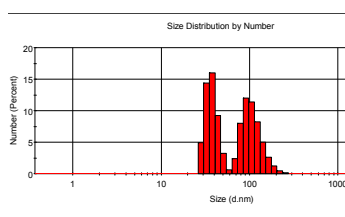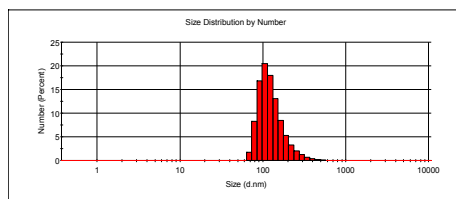

9

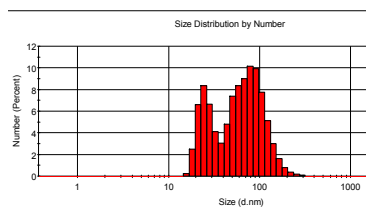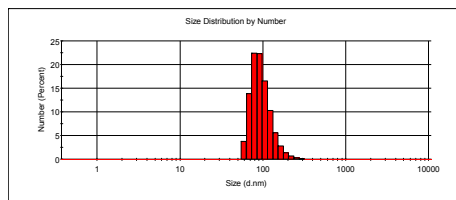

10

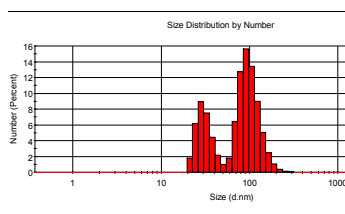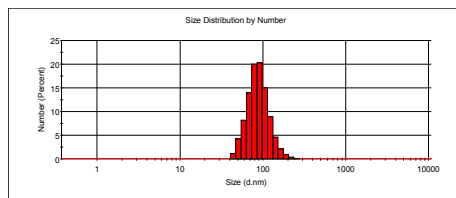

Figure S1. Dynamic light scattering (DLS) of ZnPc-dependent polymeric NPs prepared with (PLL-NPs) and without PLL coating (Si-NPs). The doping ratio of ZnPc ranges from 1% to 10%.

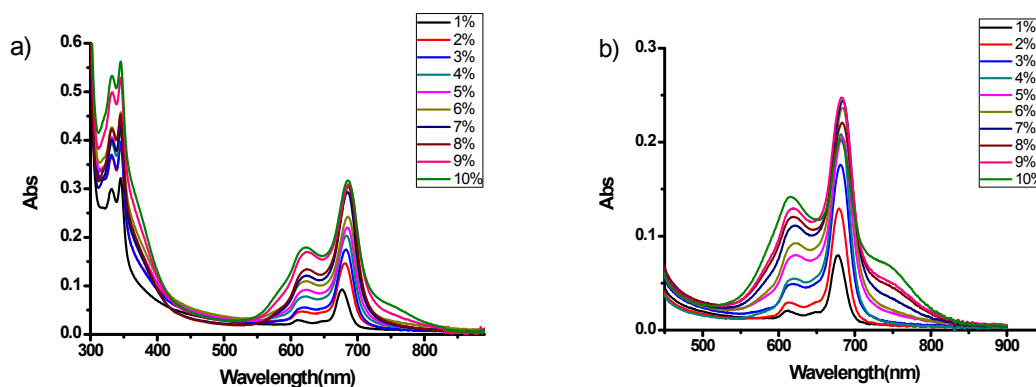

Figure S2. UV/Vis absorption spectra of (a) PVK- and (b) PFO-based PLL-NPs with different loading capacity of ZnPc (1-10%).

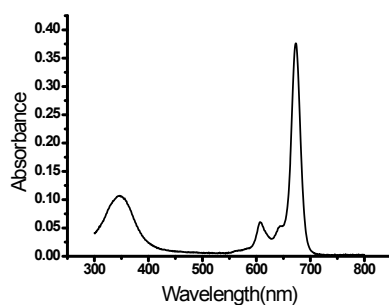

Figure S3. UV/Vis absorption of ZnPc in DMSO solution. Concentration of ZnPc is diluted down to 1 ppm to ensure that ZnPc molecules are in monomeric state.

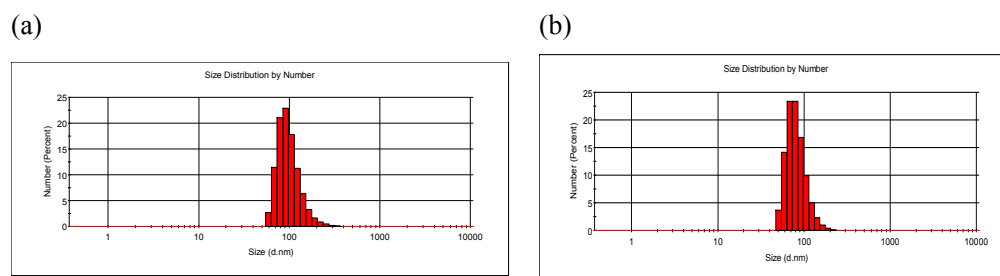

Figure S4. DLS of (a) PVK- and (b) PFO-based PLL-NPs doped with 10% ZnPc.

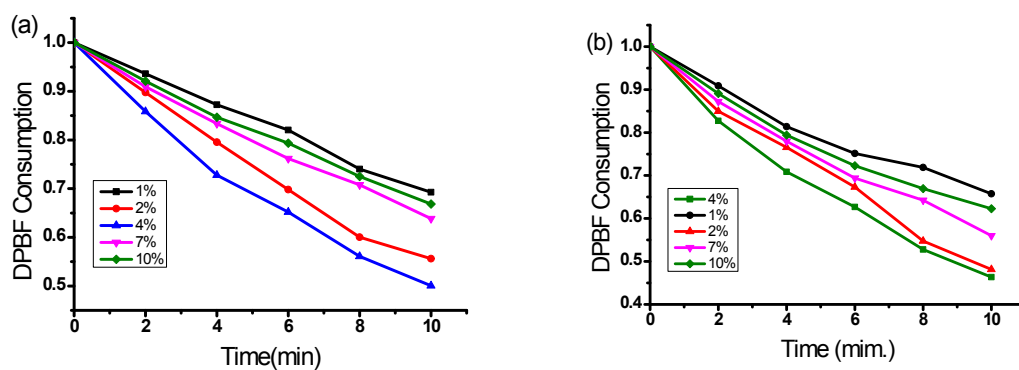

Figure S5. Consumption of DPBF for (a) PVK- and (b) PFO-based PLL-NPs loaded with different percentages of ZnPc over 10 minutes.

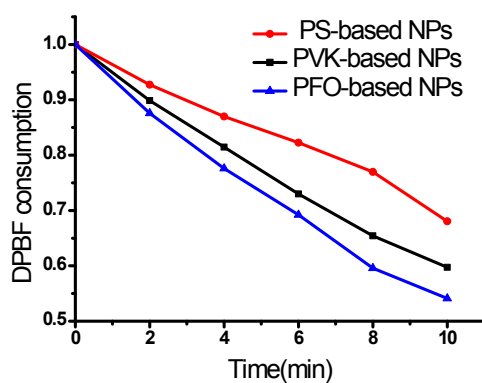

Figure S6. Comparison of consumption rate of DPBF between PS-, PVK- and PFO-based PLL-NPs doped with 8% ZnPc. The difference in singlet oxygen generation rate is obviously, and PFO-based nanophotsensitizers have the highest generation rate.

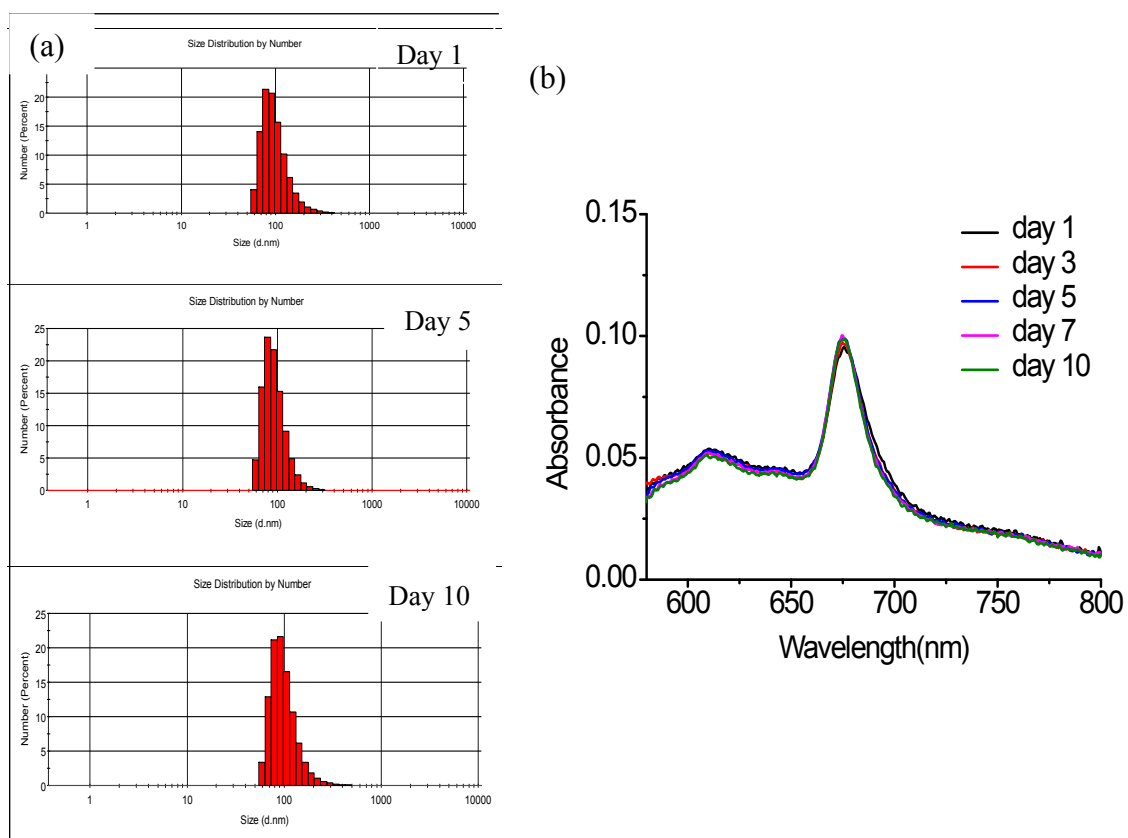

Figure S7. Stability of ZnPc-loaded PLL-NPs dispersed in DMEM supplemented with 10% FBS: (a) DLS recorded at day 1, 5 and 10; (b) UV/Vis absorption spectra measured at day 1, 3, 5, 7 and 10 days respectively.
